Development 135, 3173 (2008) doi:10.1242/dev.028258

## Abnormal sympathetic nervous system development and physiological dysautonomia in Egr3-deficient mice

**Laurie C. Eldredge, Xiaoguang M. Gao, David H. Quach, Lin Li, Xiaoqiang Han, Jon Lomasney and Warren G. Tourtellotte**

There was an error in the ePress version of this article published on 24 July 2008.

David Quach's middle initial was incorrectly given as 'M'.

The correct author list appears above, and the print and final online versions are correct.

The authors apologise to readers for this mistake.
